# Supplementary material
Source: PubMed Central journal article supplement (PMC2912417)

## SUPPORTING INFORMATION

### Mechanistic Investigation of the Inhibition of A $\beta$ 42 Assembly and Neurotoxicity by A $\beta$ 42 C-terminal fragments.

Huiyuan Li<sup>1</sup>, Bernhard H. Monien<sup>1,8</sup>, Aleksey Lomakin<sup>5</sup>, Reeve Zemel<sup>1</sup>, Erica A. Fradinger<sup>1,9</sup>, Miao Tan<sup>2</sup>, Sean M. Spring<sup>1</sup>, Brigita Urbanc<sup>7</sup>, Cui-Wei Xie<sup>2,3</sup>, George B. Benedek<sup>5,6</sup>, Gal Bitan<sup>1,3,4,\*</sup>

From <sup>1</sup>Department of Neurology, <sup>2</sup>Psychiatry and Biobehavioral Sciences, David Geffen School of Medicine, <sup>3</sup>Brain Research Institute, and <sup>4</sup>Molecular Biology Institute, University of California at Los Angeles, 635 Charles E. Young Drive, Los Angeles, CA, 90095, <sup>5</sup>Materials Processing Center, <sup>6</sup>Department of Physics, Massachusetts Institute of Technology, 77 Massachusetts Avenue, Cambridge, MA, 02139, and <sup>7</sup>Physics Department, Drexel University, 3141 Chestnut St. Philadelphia, PA 19104.

<sup>8</sup>Current address: Deutsches Institut für Ernährungsforschung Potsdam-Rehbrücke, Abt. Ernährungstoxikologie, Arthur-Scheunert-Allee 114-116, 14558 Nuthetal, Germany, <sup>9</sup>Current address: Department of Biology, Whittier College, 13406 E Philadelphia St., Whittier, CA 90608.

\* To whom correspondence should be addressed. E-mail: gbitan@mednet.ucla.edu.

**Figure S1. PICUP-SDS-PAGE analysis.** LMW A $\beta$ 42 (~20  $\mu$ M) was mixed with increasing concentrations of CTF and photo-cross-linked immediately. The mixtures were fractionated by SDS-PAGE and silver-stained. Positions of molecular-weight markers are shown on the left. The concentrations of CTF are indicated at the bottom of each lane. A) A $\beta$ 42+A $\beta$ (29–42). B) A $\beta$ 42+A $\beta$ (32–42). C) A $\beta$ (36–42) through A $\beta$ (39–42).

**Figure S2. Evaluation of A $\beta$ (30–40) inhibition of A $\beta$ 42-induced toxicity.** A) Cell death determined by the LDH-release assay in differentiated PC-12 cells in the presence of 10  $\mu$ M A $\beta$ 42 and A $\beta$ 42:CTF concentration ratios ranging from 1:1 to 1:10. The data were normalized to full-kill and media controls and are reported as mean  $\pm$  SEM (n = 18). B) Mouse primary hippocampal neurons were exposed to vehicle (n = 12), 3  $\mu$ M A $\beta$ 42 (n = 8), or 1:10 A $\beta$ 42:A $\beta$ (30–40) (n = 6), and the frequency and amplitude of mEPSCs were measured. Cells were perfused with vehicle for 5 min to establish baseline and then with peptide solutions for additional 20 min, and allowed to recover in vehicle solution for 15 min. The curves show the time dependence of mEPSC frequency after exposure to A $\beta$ 42 in the absence or presence of A $\beta$ (30–40) over 40 min.

**Figure S3. Correlation analysis.** A) Linear regression analysis correlating inhibition of paranucleus formation for A $\beta$ (29–42), A $\beta$ (30–42), A $\beta$ (31–42), and A $\beta$ (33–42) with T<sub>50</sub> of  $\beta$ -sheet formation by each CTF (I) ( $r^2 = 0.96$ ,  $p = 0.02$ ). B). Linear regression analysis correlating inhibition of paranucleus formation for A $\beta$ (29–42), A $\beta$ (30–42), A $\beta$ (31–42), and A $\beta$ (33–42) with rate of aggregation of each CTF (by itself) (I) ( $r^2 = 0.94$ ,  $p = 0.04$ ).

1. Li, H., Monien, B. H., Fradinger, E. A., Urbanc, B., and Bitan, G. (2010) Biophysical characterization of A $\beta$ 42 C-terminal fragments: inhibitors of A $\beta$ 42 neurotoxicity, *Biochemistry* 49, 1259–1267.

FIGURE S1

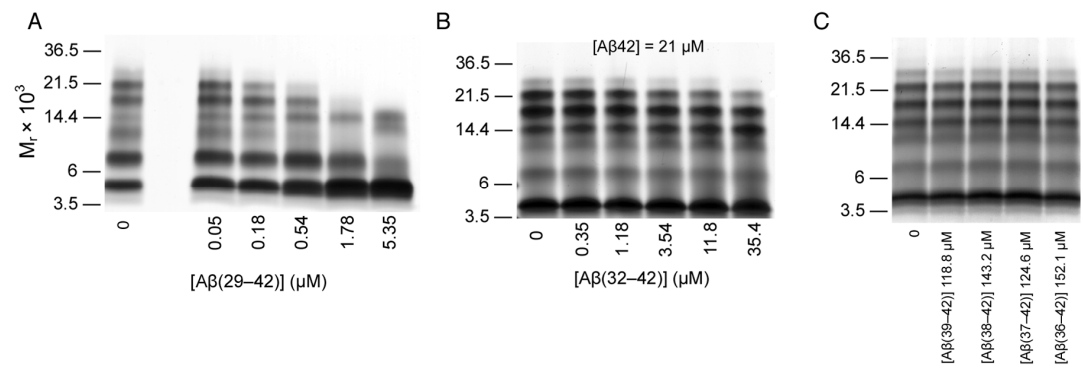

FIGURE S2

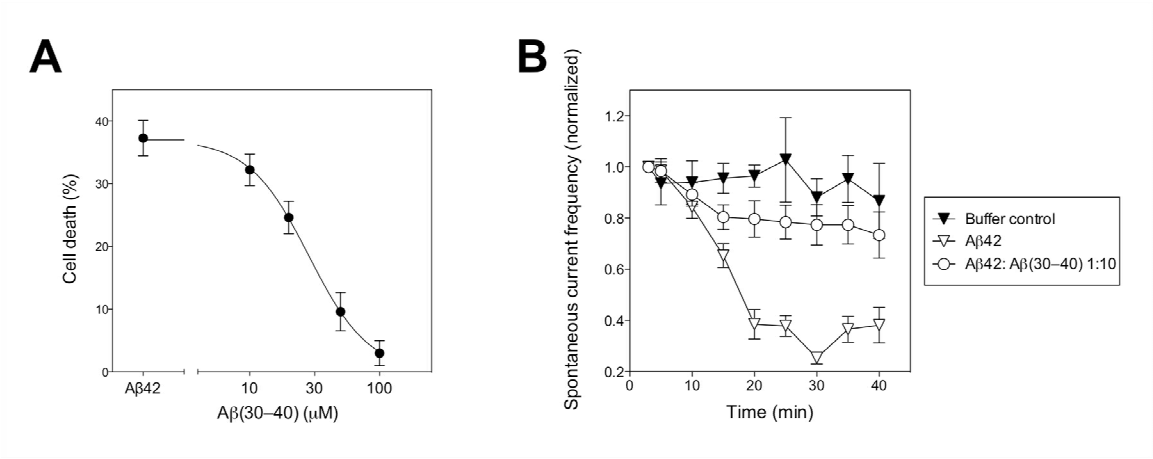

FIGURE S3

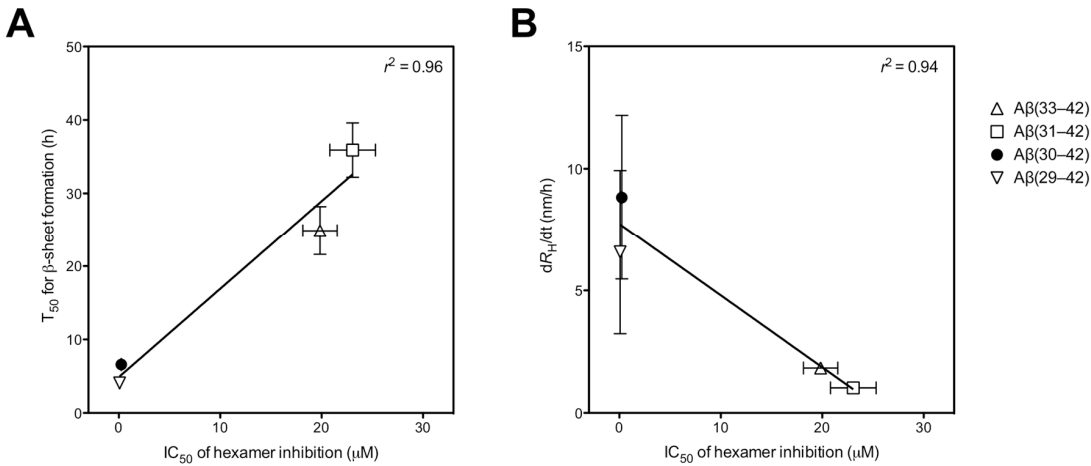

Supplement: NIHMS220755-supplement-1_si_001.pdf [file NIHMS220755-supplement-1_si_001.pdf]
